# Supplementary material for: Potential Diagnostic and Monitoring Biomarkers of Obstructive Sleep Apnea–Umbrella Review of Meta-Analyses
Source: MDPI journal article supplement (doi:10.3390/jcm12010060), 2022-12-21
Supplement: s1 [file s1]

**Table S2. Summary of meta-analyses included with quality assessment.**

| Author                             | Year | Chosen serum or plasma biomarkers | Quality assessment of study - AMSTAR 2 |              |                  |                          |                     |                     |                                    |                              |                  |                      |                          |                                    |                                         |                                   |                       |                           |
|------------------------------------|------|-----------------------------------|----------------------------------------|--------------|------------------|--------------------------|---------------------|---------------------|------------------------------------|------------------------------|------------------|----------------------|--------------------------|------------------------------------|-----------------------------------------|-----------------------------------|-----------------------|---------------------------|
|                                    |      |                                   | (1) Question and inclusion             | (2) Protocol | (3) Study design | (4) Comprehensive search | (5) Study selection | (6) Data extraction | (7) Excluded studies justification | (8) Included studies details | (9) Risk of Bias | (10) Funding sources | (11) Statistical Methods | (12) Risk of Bias in Meta-analysis | (13) Risk of Bias in Individual Studies | (14) Explanation of heterogeneity | (15) Publication Bias | (16) Conflict of Interest |
| Comparison to the control group    |      |                                   |                                        |              |                  |                          |                     |                     |                                    |                              |                  |                      |                          |                                    |                                         |                                   |                       |                           |
| Nadeem et al. <sup>31</sup>        | 2013 | CRP, TNF- $\alpha$ , IL-6, IL-8   | YES                                    | NO           | NO               | PART. YES                | YES                 | YES                 | NO                                 | PART. YES                    | NO               | NO                   | NO                       | YES                                | YES                                     | YES                               | YES                   | YES                       |
| Li et al. <sup>32</sup>            | 2013 | Hcy                               | YES                                    | NO           | NO               | PART. YES                | YES                 | YES                 | NO                                 | PART. YES                    | PART. YES        | NO                   | NO                       | YES                                | NO                                      | YES                               | YES                   | YES                       |
| Niu et al. <sup>33</sup>           | 2014 | Hcy                               | YES                                    | NO           | NO               | PART. YES                | YES                 | YES                 | NO                                 | PART. YES                    | NO               | NO                   | NO                       | YES                                | YES                                     | YES                               | YES                   | YES                       |
| Nadeem et al. <sup>34</sup>        | 2014 | TC, LDLc, HDLc, TG                | YES                                    | PART. YES    | NO               | PART. YES                | YES                 | YES                 | NO                                 | NO                           | NO               | NO                   | NO                       | NO                                 | NO                                      | NO                                | YES                   | YES                       |
| De Luca Canto et al. <sup>35</sup> | 2015 | IL-6<br>TNF- $\alpha$ , IL-10     | YES                                    | YES          | NO               | PART. YES                | YES                 | YES                 | YES                                | PART. YES                    | PART. YES        | NO                   | YES                      | YES                                | YES                                     | YES                               | YES                   | YES                       |
| Wang et al. <sup>8</sup>           | 2015 | IL-6                              | YES                                    | NO           | NO               | PART. YES                | YES                 | YES                 | NO                                 | PART. YES                    | PART. YES        | NO                   | YES                      | YES                                | YES                                     | YES                               | YES                   | YES                       |
| Li et al. <sup>36</sup>            | 2017 | CRP                               | YES                                    | NO           | NO               | PART. YES                | YES                 | YES                 | NO                                 | YES                          | NO               | NO                   | NO                       | YES                                | YES                                     | YES                               | YES                   | YES                       |

| Author                            | Year | Chosen serum or plasma biomarkers | Quality assessment of study - AMSTAR 2 |              |                  |                          |                     |                     |                                    |                              |                  |                      |                          |                                    |                                         |                                   |                       |                           |
|-----------------------------------|------|-----------------------------------|----------------------------------------|--------------|------------------|--------------------------|---------------------|---------------------|------------------------------------|------------------------------|------------------|----------------------|--------------------------|------------------------------------|-----------------------------------------|-----------------------------------|-----------------------|---------------------------|
|                                   |      |                                   | (1) Question and inclusion             | (2) Protocol | (3) Study design | (4) Comprehensive search | (5) Study selection | (6) Data extraction | (7) Excluded studies justification | (8) Included studies details | (9) Risk of Bias | (10) Funding sources | (11) Statistical Methods | (12) Risk of Bias in Meta-analysis | (13) Risk of Bias in Individual Studies | (14) Explanation of heterogeneity | (15) Publication Bias | (16) Conflict of Interest |
| Li et al. <sup>37</sup>           | 2017 | TNF                               | YES                                    | NO           | NO               | PART. YES                | YES                 | YES                 | NO                                 | YES                          | NO               | NO                   | YES                      | NO                                 | YES                                     | NO                                | YES                   | YES                       |
| Zhang et al. <sup>38</sup>        | 2017 | VEGF                              | YES                                    | NO           | NO               | NO                       | YES                 | NO                  | NO                                 | YES                          | NO               | NO                   | NO                       | NO                                 | YES                                     | YES                               | YES                   | NO                        |
| Sookoian et al. <sup>39</sup>     | 2017 | ALT, AST                          | YES                                    | NO           | NO               | PART. YES                | YES                 | NO                  | NO                                 | PART. YES                    | NO               | NO                   | NO                       | YES                                | YES                                     | YES                               | YES                   | YES                       |
| Van der Touw et al. <sup>40</sup> | 2019 | CRP                               | YES                                    | NO           | NO               | PART. YES                | YES                 | YES                 | NO                                 | PART. YES                    | NO               | NO                   | NO                       | NO                                 | YES                                     | YES                               | YES                   | YES                       |
| Lu et al. <sup>128</sup>          | 2019 | adiponectin                       | YES                                    | YES          | NO               | PART. YES                | YES                 | YES                 | NO                                 | YES                          | YES              | NO                   | YES                      | YES                                | YES                                     | YES                               | YES                   | YES                       |
| Qiu et al. <sup>41</sup>          | 2020 | VEGF                              | YES                                    | NO           | NO               | PART. YES                | YES                 | YES                 | NO                                 | YES                          | YES              | NO                   | YES                      | YES                                | YES                                     | YES                               | NO                    | YES                       |
| Imani et al. <sup>42</sup>        | 2020 | IL-6                              | YES                                    | NO           | NO               | PART. YES                | YES                 | YES                 | NO                                 | YES                          | YES              | YES                  | NO                       | YES                                | YES                                     | YES                               | YES                   | YES                       |
| Imani et al. <sup>43</sup>        | 2020 | TNF- $\alpha$                     | YES                                    | PART. YES    | NO               | PART. YES                | YES                 | YES                 | NO                                 | YES                          | YES              | NO                   | YES                      | NO                                 | YES                                     | YES                               | YES                   | NO                        |
| Cao et al. <sup>44</sup>          | 2020 | TNF- $\alpha$                     | YES                                    | YES          | NO               | PART. YES                | YES                 | YES                 | NO                                 | YES                          | PART. YES        | NO                   | YES                      | YES                                | YES                                     | YES                               | YES                   | YES                       |

| Author                                         | Year | Chosen serum or plasma biomarkers | Quality assessment of study - AMSTAR 2 |              |                  |                          |                     |                     |                                    |                              |                  |                      |                          |                                    |                                         |                                   |                       |                           |
|------------------------------------------------|------|-----------------------------------|----------------------------------------|--------------|------------------|--------------------------|---------------------|---------------------|------------------------------------|------------------------------|------------------|----------------------|--------------------------|------------------------------------|-----------------------------------------|-----------------------------------|-----------------------|---------------------------|
|                                                |      |                                   | (1) Question and inclusion             | (2) Protocol | (3) Study design | (4) Comprehensive search | (5) Study selection | (6) Data extraction | (7) Excluded studies justification | (8) Included studies details | (9) Risk of Bias | (10) Funding sources | (11) Statistical Methods | (12) Risk of Bias in Meta-analysis | (13) Risk of Bias in Individual Studies | (14) Explanation of heterogeneity | (15) Publication Bias | (16) Conflict of Interest |
| Fadaei et al. <sup>45</sup>                    | 2020 | MDA                               | YES                                    | NO           | NO               | PART. YES                | YES                 | NO                  | NO                                 | PART. YES                    | PART. YES        | NO                   | NO                       | YES                                | YES                                     | YES                               | YES                   | YES                       |
| Li et al. <sup>46</sup>                        | 2021 | IL-8                              | YES                                    | YES          | YES              | YES                      | YES                 | YES                 | NO                                 | YES                          | YES              | NO                   | YES                      | YES                                | YES                                     | YES                               | YES                   | YES                       |
| Imani et al. <sup>47</sup>                     | 2021 | CRP                               | YES                                    | NO           | NO               | NO                       | YES                 | YES                 | NO                                 | PART. YES                    | PART. YES        | NO                   | YES                      | YES                                | YES                                     | YES                               | YES                   | YES                       |
| Li et al. <sup>48</sup>                        | 2021 | Leptin                            | YES                                    | YES          | NO               | PART. YES                | YES                 | YES                 | NO                                 | YES                          | PART. YES        | NO                   | YES                      | YES                                | YES                                     | YES                               | YES                   | YES                       |
| Imani et al. <sup>132</sup>                    | 2021 | Cortisol                          | YES                                    | PART. YES    | NO               | PART. YES                | YES                 | YES                 | NO                                 | YES                          | PART. YES        | NO                   | YES                      | YES                                | YES                                     | YES                               | YES                   | YES                       |
| Yi et al. <sup>49</sup>                        | 2022 | IL-8                              | YES                                    | NO           | NO               | PART. YES                | YES                 | YES                 | NO                                 | YES                          | YES              | NO                   | YES                      | YES                                | YES                                     | YES                               | YES                   | YES                       |
| Yi et al. <sup>50</sup>                        | 2022 | CRP, TNF- $\alpha$                | YES                                    | NO           | NO               | PART. YES                | YES                 | YES                 | NO                                 | PART. YES                    | PART. YES        | NO                   | YES                      | YES                                | YES                                     | YES                               | YES                   | YES                       |
| He et al. <sup>51</sup>                        | 2022 | IGF-1                             | YES                                    | NO           | NO               | PART. YES                | YES                 | YES                 | NO                                 | PART. YES                    | PART. YES        | NO                   | YES                      | YES                                | YES                                     | YES                               | YES                   | YES                       |
| Change after treatment - CPAP or sleep surgery |      |                                   |                                        |              |                  |                          |                     |                     |                                    |                              |                  |                      |                          |                                    |                                         |                                   |                       |                           |
| Hecht et al. <sup>131</sup>                    | 2011 | adiponectin                       | YES                                    | PART. YES    | YES              | PART. YES                | YES                 | YES                 | NO                                 | PART. YES                    | PART. YES        | NO                   | NO                       | NO                                 | YES                                     | NO                                | NO                    | YES                       |

| Author                        | Year | Chosen serum or plasma biomarkers | Quality assessment of study - AMSTAR 2 |              |                  |                          |                     |                     |                                    |                              |                  |                      |                          |                                    |                                         |                                   |                       |                           |
|-------------------------------|------|-----------------------------------|----------------------------------------|--------------|------------------|--------------------------|---------------------|---------------------|------------------------------------|------------------------------|------------------|----------------------|--------------------------|------------------------------------|-----------------------------------------|-----------------------------------|-----------------------|---------------------------|
|                               |      |                                   | (1) Question and inclusion             | (2) Protocol | (3) Study design | (4) Comprehensive search | (5) Study selection | (6) Data extraction | (7) Excluded studies justification | (8) Included studies details | (9) Risk of Bias | (10) Funding sources | (11) Statistical Methods | (12) Risk of Bias in Meta-analysis | (13) Risk of Bias in Individual Studies | (14) Explanation of heterogeneity | (15) Publication Bias | (16) Conflict of Interest |
| Friedman et al. <sup>52</sup> | 2012 | CRP                               | YES                                    | NO           | YES              | PART. YES                | YES                 | YES                 | NO                                 | YES                          | PART. YES        | NO                   | YES                      | YES                                | YES                                     | YES                               | YES                   | YES                       |
| Xie et al. <sup>53</sup>      | 2013 | CRP, IL-6, IL-8, TNF- $\alpha$    | YES                                    | NO           | NO               | PART. YES                | YES                 | YES                 | NO                                 | PART. YES                    | NO               | NO                   | NO                       | YES                                | YES                                     | YES                               | YES                   | YES                       |
| Guo et al. <sup>54</sup>      | 2013 | CRP                               | YES                                    | PART. YES    | NO               | YES                      | YES                 | YES                 | NO                                 | PART. YES                    | NO               | NO                   | NO                       | NO                                 | YES                                     | YES                               | YES                   | YES                       |
| Baessler et al. <sup>55</sup> | 2013 | CRP, TNF- $\alpha$ , IL-6         | YES                                    | PART. YES    | YES              | PART. YES                | YES                 | YES                 | NO                                 | PART. YES                    | NO               | NO                   | NO                       | NO                                 | NO                                      | NO                                | NO                    | YES                       |
| Xu et al. <sup>56</sup>       | 2014 | TC, LDLc, HDLc, TG                | YES                                    | PART. YES    | YES              | PART. YES                | YES                 | YES                 | NO                                 | YES                          | YES              | NO                   | YES                      | YES                                | YES                                     | YES                               | YES                   | YES                       |
| Chen et al. <sup>57</sup>     | 2014 | HCY                               | YES                                    | NO           | NO               | PART. YES                | YES                 | YES                 | NO                                 | YES                          | NO               | NO                   | YES                      | YES                                | NO                                      | YES                               | YES                   | YES                       |
| Chen et al. <sup>58</sup>     | 2014 | IGF-1                             | YES                                    | NO           | NO               | PART. YES                | YES                 | YES                 | NO                                 | PART. YES                    | NO               | NO                   | NO                       | NO                                 | NO                                      | YES                               | YES                   | YES                       |
| Zhang et al. <sup>59</sup>    | 2014 | Leptin                            | YES                                    | NO           | NO               | PART. YES                | YES                 | YES                 | NO                                 | YES                          | NO               | NO                   | NO                       | NO                                 | YES                                     | YES                               | YES                   | YES                       |
| Chen et al. <sup>60</sup>     | 2015 | Leptin                            | YES                                    | NO           | NO               | PART. YES                | NO                  | NO                  | NO                                 | PART. YES                    | NO               | NO                   | NO                       | NO                                 | NO                                      | YES                               | YES                   | YES                       |

| Author                         | Year | Chosen serum or plasma biomarkers | Quality assessment of study - AMSTAR 2 |              |                  |                          |                     |                     |                                    |                              |                  |                      |                          |                                    |                                         |                                   |                       |                           |
|--------------------------------|------|-----------------------------------|----------------------------------------|--------------|------------------|--------------------------|---------------------|---------------------|------------------------------------|------------------------------|------------------|----------------------|--------------------------|------------------------------------|-----------------------------------------|-----------------------------------|-----------------------|---------------------------|
|                                |      |                                   | (1) Question and inclusion             | (2) Protocol | (3) Study design | (4) Comprehensive search | (5) Study selection | (6) Data extraction | (7) Excluded studies justification | (8) Included studies details | (9) Risk of Bias | (10) Funding sources | (11) Statistical Methods | (12) Risk of Bias in Meta-analysis | (13) Risk of Bias in Individual Studies | (14) Explanation of heterogeneity | (15) Publication Bias | (16) Conflict of Interest |
| Iftikhar et al. <sup>130</sup> | 2015 | adiponectin                       | YES                                    | YES          | YES              | NO                       | NO                  | YES                 | NO                                 | PART. YES                    | PART. YES        | NO                   | YES                      | YES                                | NO                                      | YES                               | YES                   | YES                       |
| Chen et al. <sup>129</sup>     | 2015 | adiponectin                       | YES                                    | PART. YES    | NO               | PART. YES                | YES                 | YES                 | NO                                 | YES                          | PART. YES        | NO                   | YES                      | YES                                | NO                                      | YES                               | YES                   | YES                       |
| Zhong et al. <sup>61</sup>     | 2016 | IL-6                              | YES                                    | PART. YES    | NO               | YES                      | YES                 | YES                 | NO                                 | PART. YES                    | NO               | NO                   | NO                       | NO                                 | NO                                      | YES                               | YES                   | YES                       |
| Chen et al. <sup>62</sup>      | 2018 | ALT AST                           | YES                                    | PART. YES    | NO               | PART. YES                | YES                 | YES                 | NO                                 | YES                          | NO               | NO                   | NO                       | NO                                 | NO                                      | YES                               | YES                   | YES                       |
| Qi et al. <sup>63</sup>        | 2018 | VEGF                              | YES                                    | YES          | YES              | PART. YES                | YES                 | YES                 | NO                                 | PART. YES                    | YES              | NO                   | NO                       | YES                                | YES                                     | YES                               | YES                   | YES                       |
| Ning et al. <sup>64</sup>      | 2019 | hsCRP, IL-6, TNF- $\alpha$        | YES                                    | PART. YES    | YES              | YES                      | YES                 | YES                 | NO                                 | PART. YES                    | NO               | NO                   | YES                      | YES                                | NO                                      | YES                               | YES                   | YES                       |
| Chen et al. <sup>65</sup>      | 2020 | MDA                               | YES                                    | PART. YES    | NO               | YES                      | YES                 | YES                 | NO                                 | YES                          | NO               | NO                   | NO                       | NO                                 | NO                                      | YES                               | YES                   | YES                       |
| Fadaei et al. <sup>66</sup>    | 2020 | MDA                               | YES                                    | YES          | NO               | YES                      | YES                 | YES                 | NO                                 | YES                          | NO               | NO                   | YES                      | YES                                | YES                                     | YES                               | YES                   | YES                       |
| Kang et al. <sup>67</sup>      | 2021 | CRP                               | YES                                    | YES          | NO               | PART. YES                | YES                 | YES                 | NO                                 | YES                          | YES              | NO                   | YES                      | YES                                | YES                                     | YES                               | YES                   | YES                       |

| Author                         | Year | Chosen serum or plasma biomarkers        | Quality assessment of study - AMSTAR 2 |              |                  |                          |                     |                     |                                    |                              |                  |                      |                          |                                    |                                         |                                   |                       |                           |
|--------------------------------|------|------------------------------------------|----------------------------------------|--------------|------------------|--------------------------|---------------------|---------------------|------------------------------------|------------------------------|------------------|----------------------|--------------------------|------------------------------------|-----------------------------------------|-----------------------------------|-----------------------|---------------------------|
|                                |      |                                          | (1) Question and inclusion             | (2) Protocol | (3) Study design | (4) Comprehensive search | (5) Study selection | (6) Data extraction | (7) Excluded studies justification | (8) Included studies details | (9) Risk of Bias | (10) Funding sources | (11) Statistical Methods | (12) Risk of Bias in Meta-analysis | (13) Risk of Bias in Individual Studies | (14) Explanation of heterogeneity | (15) Publication Bias | (16) Conflict of Interest |
| Lee et al. <sup>68</sup>       | 2021 | TC, LDLc, HDLc, TG                       | YES                                    | YES          | NO               | PART. YES                | YES                 | YES                 | NO                                 | YES                          | YES              | NO                   | YES                      | YES                                | YES                                     | YES                               | YES                   | YES                       |
| Tian et al. <sup>69</sup>      | 2021 | ICAM-1, VCAM-1                           | YES                                    | NO           | NO               | PART. YES                | YES                 | YES                 | NO                                 | YES                          | YES              | NO                   | NO                       | YES                                | NO                                      | YES                               | YES                   | YES                       |
| Ken-Dror et al. <sup>133</sup> | 2021 | Cortisol                                 | YES                                    | NO           | NO               | PART. YES                | YES                 | YES                 | NO                                 | PART. YES                    | PART. YES        | NO                   | YES                      | YES                                | YES                                     | YES                               | YES                   | YES                       |
| Wang et al. <sup>70</sup>      | 2022 | CRP TNF- $\alpha$ , lipid profile        | YES                                    | YES          | YES              | PART. YES                | YES                 | YES                 | NO                                 | PART. YES                    | YES              | NO                   | NO                       | YES                                | NO                                      | YES                               | YES                   | YES                       |
| Lee et al. <sup>71</sup>       | 2022 | TNF- $\alpha$ , IL-6                     | YES                                    | YES          | NO               | PART. YES                | YES                 | YES                 | NO                                 | YES                          | YES              | NO                   | NO                       | YES                                | YES                                     | YES                               | YES                   | YES                       |
| Lee et al. <sup>72</sup>       | 2022 | lipid profile                            | YES                                    | YES          | NO               | PART. YES                | YES                 | YES                 | NO                                 | YES                          | YES              | NO                   | NO                       | YES                                | YES                                     | YES                               | YES                   | YES                       |
| Yeo et al. <sup>73</sup>       | 2022 | CRP, lipid profile, TNF- $\alpha$ , IL-6 | YES                                    | YES          | NO               | YES                      | YES                 | YES                 | NO                                 | YES                          | YES              | NO                   | YES                      | YES                                | YES                                     | YES                               | YES                   | YES                       |
